# Supplementary material for: Characterization of changes in the hemagglutinin that accompanied the emergence of H3N2/1968 pandemic influenza viruses
Source: PubMed Central journal article supplement (PMC8491938; doi:10.1371/journal.ppat.1009566), 2021-09-23

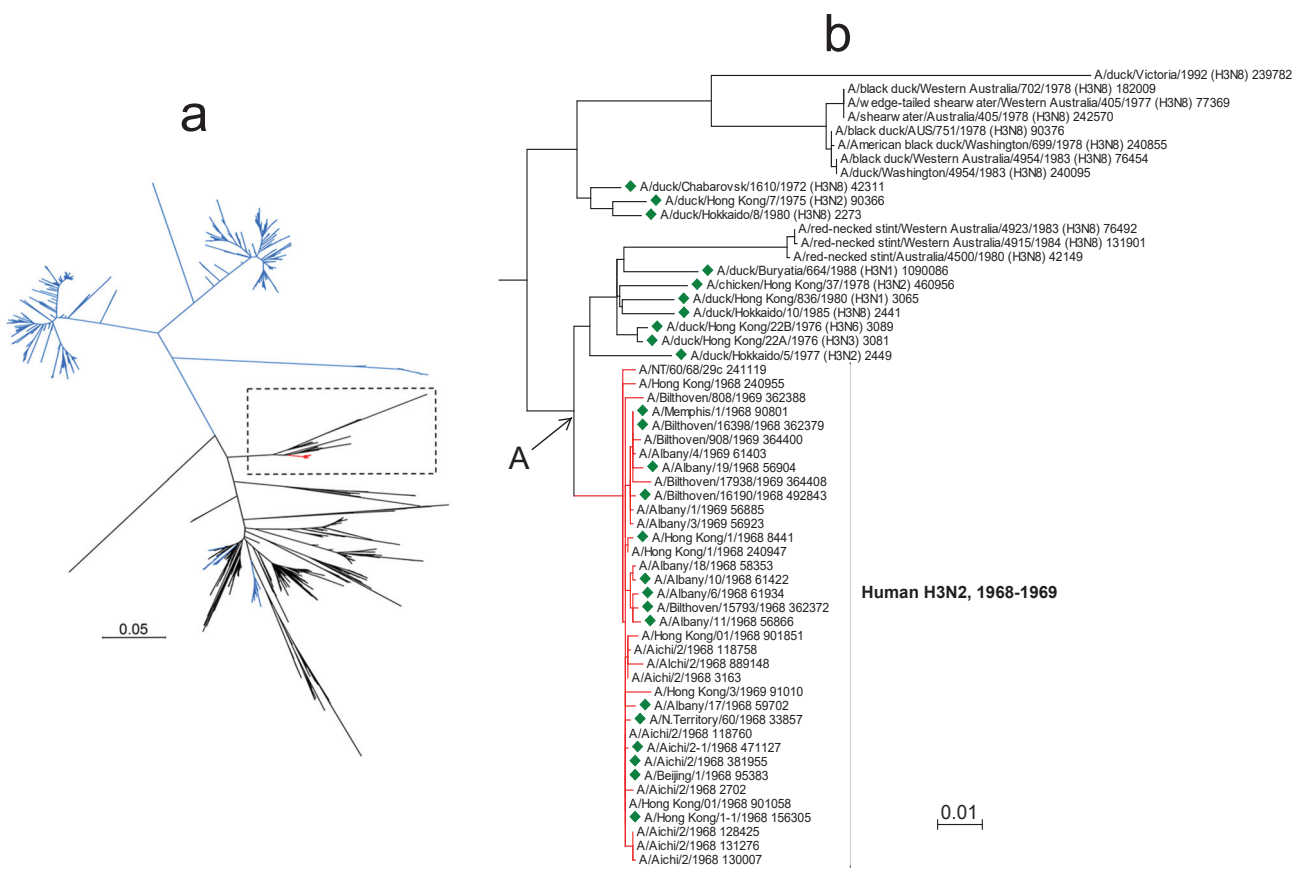

dk/Hong\_Kong/22B/1976\_3089  
 dk/Hong\_Kong/22A/1976\_3081  
 ck/Hokkaido/10/1985\_2441  
 ck/Hong\_Kong/37/1978\_460956  
 dk/Buryatia/644/1988\_1090086  
 dk/Hong\_Kong/836/1980\_3065  
 dk/Hong\_Kong/7/1975\_90366  
 dk/Chabarovsk/1610/1972\_42311  
 dk/Hokkaido/8/1980\_2273  
 Avian ancestor  
 A/Hong\_Kong/1/1968\_8441  
 A/Hong\_Kong/1-1/1968\_156305  
 A/Aichi/2-1/1968\_47112  
 A/Beijing/1/1968\_95383  
 A/N\_Territory/60/1968\_33857  
 A/Bilthoven/15793/1968\_362372  
 A/Albany/10/1968\_61422  
 A/Albany/11/1968\_56866  
 A/Albany/1/1968\_59702  
 A/Memphis/1/1968\_90801  
 A/Bilthoven/16190/1968\_492843  
 A/Bilthoven/16398/1968\_362379  
 A/Albany/19/1968\_56904

dk/Hong\_Kong/22B/1976\_3089  
 dk/Hong\_Kong/22A/1976\_3081  
 ck/Hokkaido/10/1985\_2441  
 ck/Hong\_Kong/37/1978\_460956  
 dk/Buryatia/644/1988\_1090086  
 dk/Hong\_Kong/836/1980\_3065  
 dk/Hong\_Kong/7/1975\_90366  
 dk/Chabarovsk/1610/1972\_42311  
 dk/Hokkaido/8/1980\_2273  
 Avian ancestor  
 A/Hong\_Kong/1/1968\_8441  
 A/Hong\_Kong/1-1/1968\_156305  
 A/Aichi/2-1/1968\_47112  
 A/Beijing/1/1968\_95383  
 A/N\_Territory/60/1968\_33857  
 A/Bilthoven/15793/1968\_362372  
 A/Albany/10/1968\_61422  
 A/Albany/11/1968\_56866  
 A/Albany/1/1968\_59702  
 A/Memphis/1/1968\_90801  
 A/Bilthoven/16190/1968\_492843  
 A/Bilthoven/16398/1968\_362379  
 A/Albany/19/1968\_56904

dk/Hong\_Kong/22B/1976\_3089  
 dk/Hong\_Kong/22A/1976\_3081  
 ck/Hokkaido/10/1985\_2441  
 ck/Hong\_Kong/37/1978\_460956  
 dk/Buryatia/644/1988\_1090086  
 dk/Hong\_Kong/836/1980\_3065  
 dk/Hong\_Kong/7/1975\_90366  
 dk/Chabarovsk/1610/1972\_42311  
 dk/Hokkaido/8/1980\_2273  
 Avian ancestor  
 A/Hong\_Kong/1/1968\_8441  
 A/Hong\_Kong/1-1/1968\_156305  
 A/Aichi/2-1/1968\_47112  
 A/Beijing/1/1968\_95383  
 A/N\_Territory/60/1968\_33857  
 A/Bilthoven/15793/1968\_362372  
 A/Albany/10/1968\_61422  
 A/Albany/11/1968\_56866  
 A/Albany/1/1968\_59702  
 A/Memphis/1/1968\_90801  
 A/Bilthoven/16190/1968\_492843  
 A/Bilthoven/16398/1968\_362379  
 A/Albany/19/1968\_56904

dk/Hong\_Kong/22B/1976\_3089  
 dk/Hong\_Kong/22A/1976\_3081  
 ck/Hokkaido/10/1985\_2441  
 ck/Hong\_Kong/37/1978\_460956  
 dk/Buryatia/644/1988\_1090086  
 dk/Hong\_Kong/836/1980\_3065  
 dk/Hong\_Kong/7/1975\_90366  
 dk/Chabarovsk/1610/1972\_42311  
 dk/Hokkaido/8/1980\_2273  
 Avian ancestor  
 A/Hong\_Kong/1/1968\_8441  
 A/Hong\_Kong/1-1/1968\_156305  
 A/Aichi/2-1/1968\_47112  
 A/Beijing/1/1968\_95383  
 A/N\_Territory/60/1968\_33857  
 A/Bilthoven/15793/1968\_362372  
 A/Albany/10/1968\_61422  
 A/Albany/11/1968\_56866  
 A/Albany/1/1968\_59702  
 A/Memphis/1/1968\_90801  
 A/Bilthoven/16190/1968\_492843  
 A/Bilthoven/16398/1968\_362379  
 A/Albany/19/1968\_56904

dk/Hong\_Kong/22B/1976\_3089  
 dk/Hong\_Kong/22A/1976\_3081  
 ck/Hokkaido/10/1985\_2441  
 ck/Hong\_Kong/37/1978\_460956  
 dk/Buryatia/644/1988\_1090086  
 dk/Hong\_Kong/836/1980\_3065  
 dk/Hong\_Kong/7/1975\_90366  
 dk/Chabarovsk/1610/1972\_42311  
 dk/Hokkaido/8/1980\_2273  
 Avian ancestor  
 A/Hong\_Kong/1/1968\_8441  
 A/Hong\_Kong/1-1/1968\_156305  
 A/Aichi/2-1/1968\_47112  
 A/Beijing/1/1968\_95383  
 A/N\_Territory/60/1968\_33857  
 A/Bilthoven/15793/1968\_362372  
 A/Albany/10/1968\_61422  
 A/Albany/11/1968\_56866  
 A/Albany/1/1968\_59702  
 A/Memphis/1/1968\_90801  
 A/Bilthoven/16190/1968\_492843  
 A/Bilthoven/16398/1968\_362379  
 A/Albany/19/1968\_56904

dk/Hong\_Kong/22B/1976\_3089  
 dk/Hong\_Kong/22A/1976\_3081  
 ck/Hokkaido/10/1985\_2441  
 ck/Hong\_Kong/37/1978\_460956  
 dk/Buryatia/644/1988\_1090086  
 dk/Hong\_Kong/836/1980\_3065  
 dk/Hong\_Kong/7/1975\_90366  
 dk/Chabarovsk/1610/1972\_42311  
 dk/Hokkaido/8/1980\_2273  
 Avian ancestor  
 A/Hong\_Kong/1/1968\_8441  
 A/Hong\_Kong/1-1/1968\_156305  
 A/Aichi/2-1/1968\_47112  
 A/Beijing/1/1968\_95383  
 A/N\_Territory/60/1968\_33857  
 A/Bilthoven/15793/1968\_362372  
 A/Albany/10/1968\_61422  
 A/Albany/11/1968\_56866  
 A/Albany/1/1968\_59702  
 A/Memphis/1/1968\_90801  
 A/Bilthoven/16190/1968\_492843  
 A/Bilthoven/16398/1968\_362379  
 A/Albany/19/1968\_56904

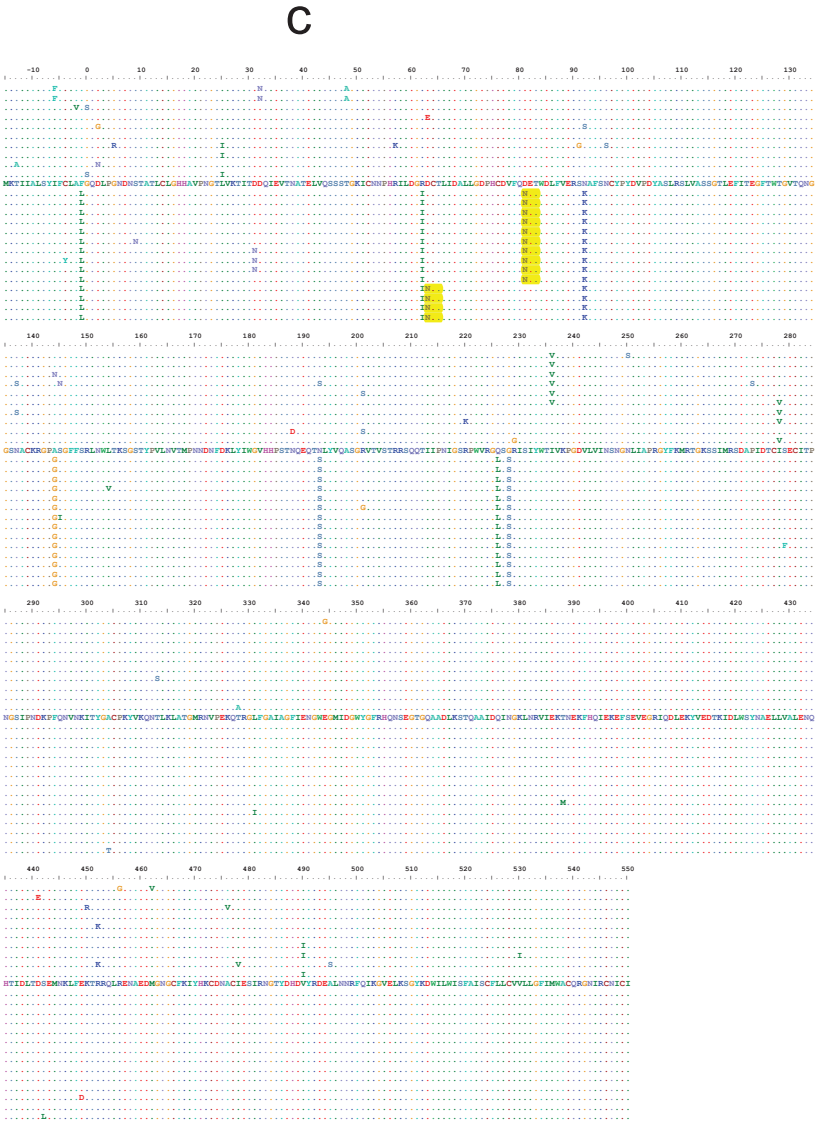

Supplement: ppat.1009566.s006.pdf [file ppat.1009566.s006.pdf]
