# Supplementary material for: Characterization of changes in the hemagglutinin that accompanied the emergence of H3N2/1968 pandemic influenza viruses
Source: PubMed Central journal article supplement (PMC8491938; doi:10.1371/journal.ppat.1009566), 2021-09-23

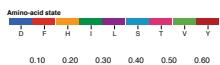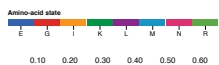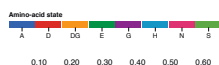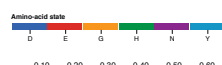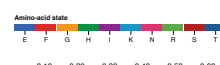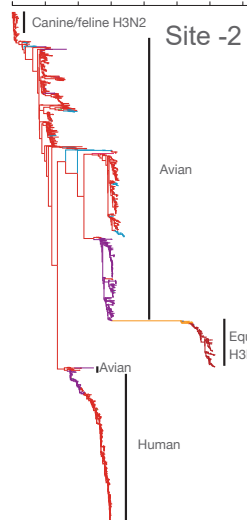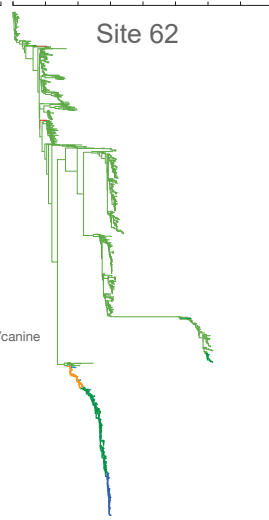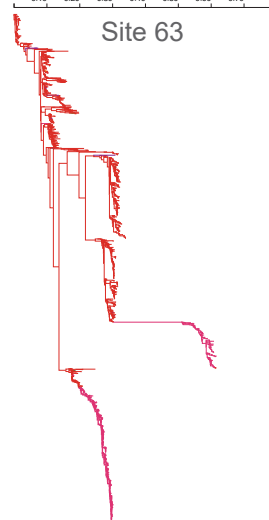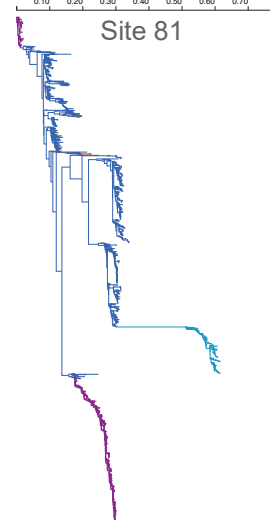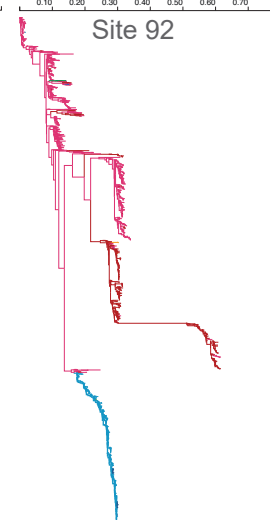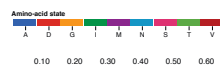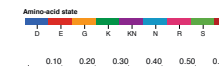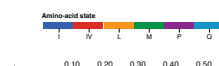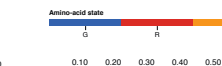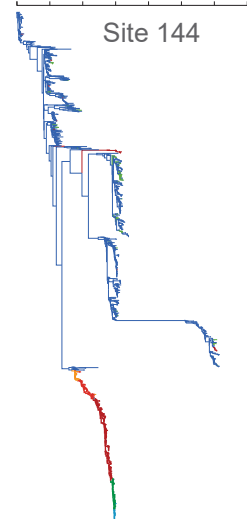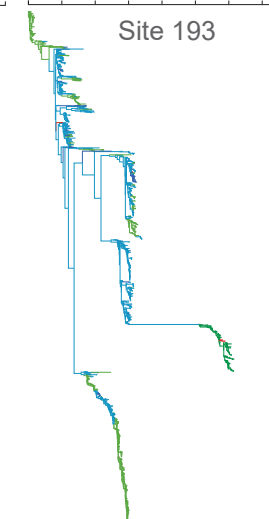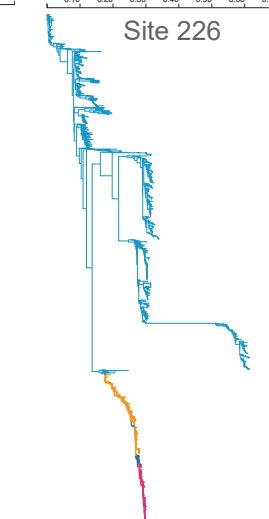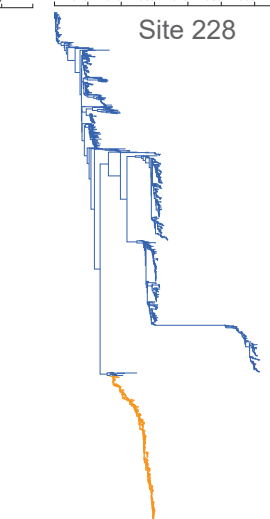

Supplement: ppat.1009566.s011.pdf [file ppat.1009566.s011.pdf]
