# Supplementary material for: Characterization of changes in the hemagglutinin that accompanied the emergence of H3N2/1968 pandemic influenza viruses
Source: PubMed Central journal article supplement (PMC8491938; doi:10.1371/journal.ppat.1009566), 2021-09-23
Supplement: ppat.1009566.s005.pdf [file ppat.1009566.s005.pdf]

**S3 Table. P values for the differences between Kass of viral complexes with SGPs presented in the Fig 3a. Values lower than 0.05 are highlighted with yellow.**

| SGPs compared                                | Virus  |        |          |         |
|----------------------------------------------|--------|--------|----------|---------|
|                                              | R7     | R2     | mal-H3N8 | rt-H7N7 |
| 3'SLN - SiaLe <sup>c</sup>                   | 1.0000 | 1.0000 | 0.3075   | 0.6782  |
| 3'Sia-TF - SiaLe <sup>c</sup>                | 0.5529 | 0.5431 | 0.0129   | 0.0608  |
| 6-Su-3'SLN - SiaLe <sup>c</sup>              | 1.0000 | 1.0000 | 0.5209   | 0.0002  |
| SiaLe <sup>x</sup> - SiaLe <sup>c</sup>      | 0.0000 | 0.0204 | 0.0000   | 0.0000  |
| 6-Su-SiaLe <sup>x</sup> - SiaLe <sup>x</sup> | 0.0000 | 0.0028 | 0.0011   | 0.0000  |
| 3'Sia-TF - 3'SLN                             | 0.1037 | 0.5431 | 0.0000   | 0.6782  |
| 6-Su-3'SLN - 3'SLN                           | 1.0000 | 1.0000 | 0.0703   | 0.0207  |
| SiaLe <sup>x</sup> - 3'SLN                   | 0.0000 | 0.0217 | 0.0071   | 0.0000  |
| 6-Su-SiaLe <sup>x</sup> - 3'SLN              | 0.0000 | 0.0030 | 0.1301   | 0.0002  |
| 6-Su-3'SLN - 3'Sia-TF                        | 0.5529 | 1.0000 | 0.1301   | 0.5230  |
| SiaLe <sup>x</sup> - 3'Sia-TF                | 0.0000 | 0.0000 | 0.0000   | 0.0071  |
| 6-Su-SiaLe <sup>x</sup> - 3'Sia-TF           | 0.0000 | 0.0000 | 0.0000   | 0.0254  |
| SiaLe <sup>x</sup> - 6-Su-3'SLN              | 0.0000 | 0.0030 | 0.0000   | 0.5230  |
| 6-Su-SiaLe <sup>x</sup> - 6-Su-3'SLN         | 0.0000 | 0.0003 | 0.0000   | 0.6782  |
| 6-Su-SiaLe <sup>x</sup> - SiaLe <sup>x</sup> | 1.0000 | 1.0000 | 0.5209   | 0.6782  |
