# Supplementary material for: Characterization of changes in the hemagglutinin that accompanied the emergence of H3N2/1968 pandemic influenza viruses
Source: PubMed Central journal article supplement (PMC8491938; doi:10.1371/journal.ppat.1009566), 2021-09-23

**a**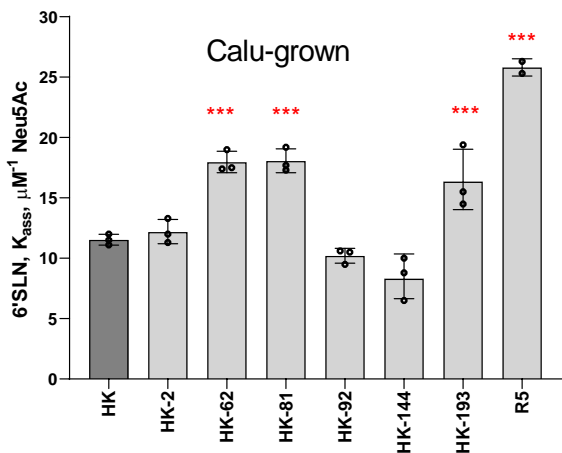**b**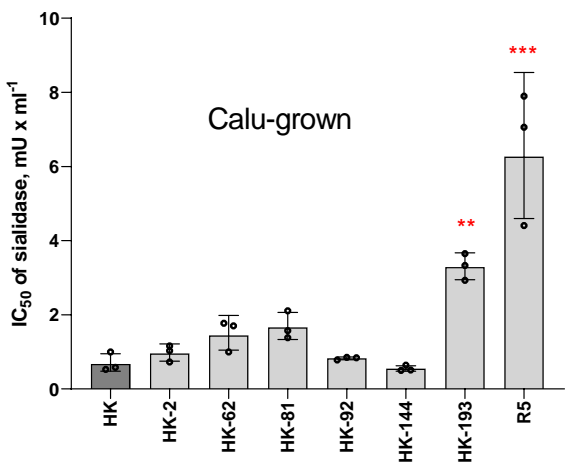**c**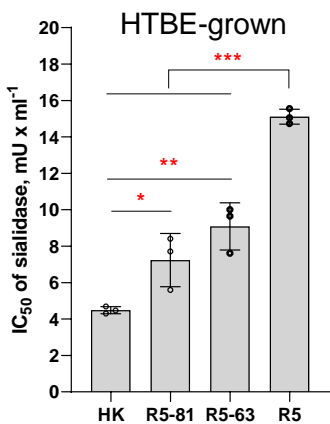

Supplement: ppat.1009566.s009.pdf [file ppat.1009566.s009.pdf]
